# Supplementary material for: Saprolegniosis in Amphibians: An Integrated Overview of a Fluffy Killer Disease
Source: MDPI journal article supplement (doi:10.3390/jof8050537), 2022-05-22

**Table S1** – ITS sequences relatively to *Saprolegniales* found associated to amphibians. Bolt names correspond to the suggested sequence after the phylogenetic analysis of the sequences compared with the suggested MOTUS in Sandoval-Sierra review.

| Accession Number | Sequences used on the tree    | MOTU/Confirmed name                   | Reference |
|------------------|-------------------------------|---------------------------------------|-----------|
| EU348372         | <i>Saprolegnia</i> sp.        | <b><i>Saprolegnia aenigmatica</i></b> | 67        |
| EU348371         | <i>Saprolegnia</i> sp.        | <b><i>Saprolegnia aenigmatica</i></b> | 67        |
| AM228837         | <i>Saprolegnia australis</i>  | <i>Saprolegnia australis</i>          | 66        |
| AM228848         | <i>Saprolegnia diclina</i>    | <i>Saprolegnia diclina</i>            | 66        |
| EU071706         | <i>Leptolegnia</i> sp.        | <b><i>Saprolegnia aenigmatica</i></b> | 59        |
| EU071707         | <i>Saprolegnia</i> sp.        | <b><i>Saprolegnia ferax</i></b>       | 59        |
| EU480454         | <i>Saprolegnia</i> sp.        | <b><i>Saprolegnia aenigmatica</i></b> | 65        |
| AM228844         | <i>Saprolegnia diclina</i>    | <i>Saprolegnia diclina</i>            | 48        |
| AM228845         | <i>Saprolegnia ferax</i>      | <i>Saprolegnia ferax</i>              | 48        |
| JQ974983         | <i>Saprolegnia ferax</i>      | <i>Saprolegnia ferax</i>              | 45        |
| JQ974984         | <i>Saprolegnia ferax</i>      | <i>Saprolegnia ferax</i>              | 45        |
| JQ974985         | <i>Saprolegnia</i> sp.        | <b><i>Saprolegnia aenigmatica</i></b> | 45        |
| JQ974986         | <i>Saprolegnia</i> sp.        | <b><i>Saprolegnia aenigmatica</i></b> | 45        |
| JQ974987         | <i>Saprolegnia</i> sp.        | <b><i>Saprolegnia aenigmatica</i></b> | 45        |
| JQ974988         | <i>Saprolegnia</i> sp.        | <b><i>Saprolegnia aenigmatica</i></b> | 45        |
| JQ974989         | <i>Achlya treleaseana</i>     | <b><i>Aplanes</i> sp.</b>             | 45        |
| JQ974990         | <i>Achlya oligacantha</i>     | <b><i>Newbya</i> sp.</b>              | 45        |
| JQ974991         | <i>Achlya</i> sp.             | <b><i>Newbya</i> sp.</b>              | 45        |
| JQ974992         | <i>Achlya</i> sp.             | <b><i>Aplanes</i> sp.</b>             | 45        |
| JQ974993         | <i>Saprolegnia</i> sp.        | <b><i>Saprolegnia</i> sp. 6</b>       | 45        |
| JQ974994         | <i>Saprolegnia</i> sp.        | <b><i>Saprolegnia</i> sp. 6</b>       | 45        |
| JQ974995         | <i>Saprolegnia</i> sp.        | <b><i>Leptolegnia</i> sp.</b>         | 45        |
| JQ974996         | <i>Saprolegnia</i> sp.        | <b><i>Leptolegnia</i> sp.</b>         | 45        |
| JQ974997         | <i>Saprolegnia</i> sp.        | <b><i>Leptolegnia</i> sp.</b>         | 45        |
| JQ974998         | <i>Saprolegnia anisospora</i> | <i>Saprolegnia anisospora</i>         | 45        |
| JQ974999         | <i>Saprolegnia torulosa</i>   | <i>Saprolegnia torulosa</i>           | 45        |
| AM228845         | <i>Saprolegnia ferax</i>      | <i>Saprolegnia ferax</i>              | 72        |

|          |                                  |                                       |          |
|----------|----------------------------------|---------------------------------------|----------|
| FN186030 | <i>Saprolegnia parasitica</i>    | <i>Saprolegnia parasitica</i>         | 72       |
| KF420212 | <i>Saprolegnia diclina</i>       | <i>Saprolegnia diclina</i>            | 72       |
| KF420214 | <i>Saprolegnia hypogyna</i>      | <b><i>Saprolegnia parasitica</i></b>  | 72       |
| KF420220 | <i>Saprolegnia delica</i>        | <i>Saprolegnia delica</i>             | 72       |
| KF420236 | <i>Saprolegnia delica</i>        | <i>Saprolegnia delica</i>             | 72       |
| KC758888 | <i>Saprolegnia diclina</i>       | <i>Saprolegnia diclina</i>            | 74       |
| KC758889 | <i>Saprolegnia diclina</i>       | <i>Saprolegnia diclina</i>            | 74       |
| KC758890 | <i>Saprolegnia torulosa</i>      | <i>Saprolegnia torulosa</i>           | 74       |
| KC758891 | <i>Saprolegnia torulosa</i>      | <i>Saprolegnia torulosa</i>           | 74       |
| KC758892 | <i>Saprolegnia torulosa</i>      | <i>Saprolegnia torulosa</i>           | 74       |
| KC758893 | <i>Saprolegnia torulosa</i>      | <i>Saprolegnia torulosa</i>           | 74       |
| KC758894 | <i>Achlya papilosa</i>           | <b><i>Aplanes sp.</i></b>             | 74       |
| KC758895 | <i>Saprolegnia turfosa</i>       | <i>Saprolegnia turfosa</i>            | 74       |
| MK372991 | <i>Saprolegnia ferax</i>         | <i>Saprolegnia ferax</i>              | 49       |
| MK046073 | <i>Saprolegnia australis</i> SC1 | <i>Saprolegnia australis</i> SC1      | In press |
| GU014271 | <i>Achlya</i> sp.                | <b><i>Saprolegnia aenigmatica</i></b> | 56       |
| GU014279 | <i>Leptolegnia</i> sp.           | <b><i>Saprolegnia</i> sp.</b>         | 56       |
| GU014277 | <i>Leptolegnia</i> sp.           | <b><i>Saprolegnia</i> sp.</b>         | 56       |
| GU014283 | <i>Saprolegnia</i> sp.           | <b><i>Saprolegnia ferax</i></b>       | 56       |
| EU124746 | <i>Saprolegnia anisospora</i>    | <i>Saprolegnia anisospora</i>         | 31       |
| EU124747 | <i>Saprolegnia anisospora</i>    | <i>Saprolegnia anisospora</i>         | 31       |
| EU124748 | <i>Saprolegnia anisospora</i>    | <i>Saprolegnia anisospora</i>         | 31       |
| EU124749 | <i>Saprolegnia</i> sp.           | <b><i>Leptolegnia</i> sp.</b>         | 31       |
| EU124750 | <i>Saprolegnia</i> sp.           | <b><i>Leptolegnia</i> sp.</b>         | 31       |
| EU124751 | <i>Saprolegnia</i> sp.           | <b><i>Leptolegnia</i> sp.</b>         | 31       |
| EU124752 | <i>Saprolegnia</i> sp.           | <b><i>Leptolegnia</i> sp.</b>         | 31       |
| EU124753 | <i>Saprolegnia</i> sp.           | <b><i>Leptolegnia</i> sp.</b>         | 31       |
| EU124754 | <i>Saprolegnia</i> sp.           | <b><i>Leptolegnia</i> sp.</b>         | 31       |
| EU124755 | <i>Saprolegnia</i> sp.           | <b><i>Leptolegnia</i> sp.</b>         | 31       |
| EU124756 | <i>Saprolegnia</i> sp.           | <b><i>Leptolegnia</i> sp.</b>         | 31       |
| EU124757 | <i>Saprolegnia</i> sp.           | <b><i>Leptolegnia</i> sp.</b>         | 31       |
| EU124758 | <i>Saprolegnia</i> sp.           | <b><i>Leptolegnia</i> sp.</b>         | 31       |

---

|                 |                                      |                                       |    |
|-----------------|--------------------------------------|---------------------------------------|----|
| <b>EU124759</b> | <i>Saprolegnia</i> sp.               | <b><i>Leptolegnia</i> sp.</b>         | 31 |
| <b>EU124760</b> | <i>Saprolegnia</i> sp.               | <b><i>Leptolegnia</i> sp.</b>         | 31 |
| <b>EU124761</b> | <i>Saprolegnia</i> sp.               | <b><i>Saprolegnia</i> sp. 6</b>       | 31 |
| <b>EU124762</b> | <i>Achlya stellata</i>               | <b><i>Newbya</i> sp.</b>              | 31 |
| <b>EU124763</b> | <i>Saprolegnia ferax</i>             | <i>Saprolegnia ferax</i>              | 31 |
| <b>EU124764</b> | <i>Saprolegnia diclina</i>           | <i>Saprolegnia diclina</i>            | 31 |
| <b>EU124765</b> | <i>Saprolegnia diclina</i>           | <i>Saprolegnia diclina</i>            | 31 |
| <b>EU124766</b> | <i>Saprolegnia cf. kauffmanniana</i> | <b><i>Saprolegnia aenigmatica</i></b> | 31 |

---

**Table S2-** Data information used in the wild saprolegniasis report map location (Figure 1). ID Correspond to the identification of the points in the map. *m.a.s.l.*- meters above sea level.

| Country     | Reference                              | ID | Latitude | Longitude | Altitude<br>(m.a.s.l) |
|-------------|----------------------------------------|----|----------|-----------|-----------------------|
| USA         | Bragg & Bragg, 1958                    | 1  | 35.2037  | -97.1715  |                       |
| USA         | Bragg, 1962                            | 2  | 35.2037  | -97.1715  |                       |
| Netherlands | Strijbosch, 1979                       | 3  | 51.8000  | 5.8000    |                       |
| Netherlands | Leuven <i>et al.</i> , 1986            | 4  | 53.3865  | 5.2365    |                       |
| Netherlands | Leuven <i>et al.</i> , 1986            | 4  | 51.3662  | 5.7056    |                       |
| Netherlands | Leuven <i>et al.</i> 1986              | 4  | 51.4891  | 4.3328    |                       |
| UK          | Banks & Beebee, 1988                   | 5  | 54.3673  | -3.4495   |                       |
| UK          | Banks & Beebee, 1988                   | 5  | 51.0863  | -0.8660   |                       |
| UK          | Beattie <i>et al.</i> , 1991           | 6  | 54.7786  | -2.0860   | 183 to 617            |
| USA         | Blaustein <i>et al.</i> , 1994         | 7  | 45.4969  | -121.8194 | 1220                  |
| Australia   | Williamson & Bull, 1994                | 8  | -35.1230 | 138.7292  |                       |
| USA         | Kiesecker & Blaustein, 1997            | 9  | 45.4969  | -121.8194 | 1220                  |
| USA         | Kiesecker & Blaustein, 1997            | 9  | 44.1025  | -121.6259 | 2000                  |
| USA         | Kiesecker & Blaustein, 1997            | 9  | 44.0321  | -121.6858 | 2000                  |
| USA         | Kiesecker & Blaustein, 1997            | 9  | 44.0903  | -121.7362 | 2600                  |
| USA         | Kiesecker & Blaustein, 1997            | 9  | 44.2146  | -121.8904 | 1500                  |
| USA         | Kiesecker & Blaustein, 1997            | 9  | 44.5319  | -122.0778 | 1190                  |
| USA         | Kiesecker & Blaustein, 1997            | 9  | 43.9252  | -121.7800 | 1190                  |
| Australia   | Berger <i>et al.</i> , 2001            | 10 | -19.2329 | 146.7809  | 1150                  |
| Australia   | Berger <i>et al.</i> , 2001            | 10 | -19.6101 | 146.9617  | 1150                  |
| USA         | Kiesecker <i>et al.</i> , 2001         | 11 | 44.5324  | -122.0777 |                       |
| USA         | Gomez-Mestre <i>et al.</i> , 2006      | 12 | 42.4925  | -70.9775  |                       |
| USA         | Johnson <i>et al.</i> , 2008           | 13 | 47.3105  | -121.2997 |                       |
| USA         | Petrisko <i>et al.</i> , 2008          | 14 | 46.1013  | -114.2616 |                       |
| USA         | Petrisko <i>et al.</i> , 2008          | 14 | 45.1067  | -116.0694 |                       |
| USA         | Petrisko <i>et al.</i> , 2008          | 14 | 47.4682  | -121.4501 |                       |
| USA         | Ruthig, 2008                           | 15 | 33.3293  | -81.7235  |                       |
| Korea       | Kim <i>et al.</i> , 2008               | 16 | 36.1590  | 127.7302  |                       |
| Spain       | Fernández-Benítez <i>et al.</i> , 2008 | 17 | 40.2950  | -5.1044   |                       |
| Sweden      | Sagvik <i>et al.</i> , 2008a, 2008b    | 18 | 57.7500  | 11.8000   |                       |
| Sweden      | (plus, same points as Uller 2009)      | 18 | 57.6692  | 11.9517   |                       |
| USA         | Ruthig, 2009                           | 19 | 37.3745  | -80.5226  |                       |

|           |                                        |    |          |           |              |
|-----------|----------------------------------------|----|----------|-----------|--------------|
| Sweden    | Uller <i>et al.</i> , 2009             | 20 | 57.7333  | 11.6667   |              |
| Sweden    | Uller <i>et al.</i> , 2009             | 20 | 57.7167  | 11.6333   |              |
| Sweden    | Uller <i>et al.</i> , 2009             | 20 | 55.7000  | 13.3500   |              |
| Sweden    | Uller <i>et al.</i> , 2009             | 20 | 55.5500  | 13.6333   |              |
| USA       | Karraker & Ruthig, 2009                | 21 | 43.9743  | -74.1875  |              |
| Cameroon  | Blackburn <i>et al.</i> , 2010         | 22 | 6.2000   | 10.4500   | 2227         |
| Colombia  | Prada-Salcedo <i>et al.</i> , 2010     | 23 | 6.0306   | -73.1499  | 2900         |
| Spain     | Fernández-Benítez <i>et al.</i> , 2011 | 24 | 40.2694  | -5.2464   | 1927         |
| Spain     | Fernández-Benítez <i>et al.</i> , 2011 | 24 | 40.3631  | -5.6097   | 1614         |
| USA       | Ault <i>et al.</i> , 2012              | 25 | 47.3106  | -121.2997 |              |
| USA       | Ruthig & Provost-Javier, 2012          | 26 | 37.3749  | -80.5224  |              |
| Argentina | Perotti <i>et al.</i> , 2013           | 27 | -41.0833 | -71.4500  | 780          |
| Argentina | Perotti <i>et al.</i> , 2013           | 27 | -41.1167 | -71.3667  |              |
| USA       | Croshaw, 2014                          | 28 | 33.8085  | -81.5829  |              |
| Scotland  | Muir <i>et al.</i> , 2015              | 29 | 55.9825  | -4.0059   | 179          |
| Scotland  | Muir <i>et al.</i> , 2015              | 29 | 55.8331  | -4.2739   | 163          |
| Scotland  | Muir <i>et al.</i> , 2015              | 29 | 55.8041  | -4.3519   | 149          |
| Scotland  | Muir <i>et al.</i> , 2015              | 29 | 55.9844  | -4.0060   | 72           |
| Scotland  | Muir <i>et al.</i> , 2015              | 29 | 56.0263  | -4.1134   | 228          |
| Scotland  | Muir <i>et al.</i> , 2015              | 29 | 56.5002  | -4.2354   | 215          |
| Scotland  | Muir <i>et al.</i> , 2015              | 29 | 56.5423  | -4.2291   | 990          |
| Scotland  | Muir <i>et al.</i> , 2015              | 29 | 56.4994  | -4.2523   | 223          |
| Scotland  | Muir <i>et al.</i> , 2015              | 29 | 56.5188  | -4.2958   | 900          |
| Scotland  | Muir <i>et al.</i> , 2015              | 29 | 56.2046  | -4.7628   | 155          |
| USA       | Urban <i>et al.</i> , 2015             | 30 | 41.4145  | -72.7008  |              |
| Korea     | Groffen <i>et al.</i> , 2019           | 31 | 37.8678  | 126.8646  |              |
| Korea     | Groffen <i>et al.</i> , 2019           | 31 | 36.4859  | 127.7378  |              |
| Korea     | Groffen <i>et al.</i> , 2019           | 31 | 36.0822  | 127.4950  |              |
| Korea     | Groffen <i>et al.</i> , 2019           | 31 | 37.6664  | 128.8459  |              |
| Korea     | Groffen <i>et al.</i> , 2019           | 31 | 37.0614  | 128.2560  |              |
| Korea     | Groffen <i>et al.</i> , 2019           | 31 | 36.3447  | 128.2489  |              |
| Korea     | Groffen <i>et al.</i> , 2019           | 31 | 34.9914  | 127.3640  |              |
| USA       | Sadinski, Gallant, & Cleaver, 2020     | 32 | 37.9531  | -119.2791 | 2800 to 3200 |
| Portugal  | Costa <i>et al.</i> in prep            | 33 | 40.6348  | -8.6587   |              |

**Table S3-** Species reported and number of reports of saprolegniasis in the wild. Data counts from literature review.

| Species                                                    | Reports in wild |
|------------------------------------------------------------|-----------------|
| <i>Anaxyrus canorus</i>                                    | 1               |
| <i>Atelopus mittermeieri</i>                               | 1               |
| <i>Bombina bombina</i>                                     | -               |
| <i>Bufo americanus</i>                                     | 1               |
| <i>Bufo boreas</i>                                         | 5               |
| <i>Bufo bufo</i>                                           | 2               |
| <i>Bufo calamita</i>                                       | 5               |
| <i>Bufo gargarizans</i>                                    | 1               |
| <i>Bufo marinus</i>                                        | 1               |
| <i>Crinia signifera</i>                                    | 1               |
| <i>Elachistocleis bicolor</i>                              | -               |
| <i>Engystomops petersi</i>                                 | -               |
| <i>Hyla molleri</i>                                        | -               |
| <i>Hyloscirtus alytolylax</i>                              | -               |
| <i>Lithobates berlandieri</i>                              | 1               |
| <i>Lithobates catesbeianus</i> ( <i>Rana catesbeiana</i> ) | 2               |
| <i>Pelobates cultripes</i>                                 | 1               |
| <i>Pelobates fuscus</i>                                    | 1               |
| <i>Pelophylax perezii</i>                                  | 1               |
| <i>Physalaemus albonotatus</i>                             | -               |
| <i>Pleurodema thaul</i>                                    | 1               |
| <i>Pseudacris crucifer</i>                                 | 2               |
| <i>Pseudacris regilla</i> ( <i>Hyla regilla</i> )          | 4               |
| <i>Pseudacris streckeri</i>                                | 1               |
| <i>Rana arvalis</i>                                        | 5               |
| <i>Rana aurora</i>                                         | 2               |
| <i>Rana cascadae</i>                                       | 4               |
| <i>R. clamitans</i>                                        | 1               |
| <i>R. dalmatina</i>                                        | -               |
| <i>R. esculenta</i>                                        | 2               |
| <i>Rana huanrenensis</i>                                   | 1               |
| <i>Rana lessonae</i>                                       | -               |
| <i>Rana luteiventris</i>                                   | 1               |
| <i>Rana plancyi chosonica</i>                              | -               |
| <i>Rana pretiosa</i>                                       | 1               |
| <i>Rana ridibunda</i>                                      | -               |
| <i>Rana sphenoccephala</i>                                 | 1               |

---

|                                  |   |
|----------------------------------|---|
| <i>Rana sylvatica</i>            | 2 |
| <i>Rana temporaria</i>           | 4 |
| <i>Scinax garbei</i>             | - |
| <i>Spea bombifrons</i>           | 1 |
| <i>Xenopus laevis</i>            | - |
| <i>Xenopus longipes</i>          | 1 |
| <i>Ambystoma gracile</i>         | 1 |
| <i>Ambystoma macrodactylum</i>   | 1 |
| <i>Ambystoma maculatum</i>       | 3 |
| <i>Ambystoma talpoideum</i>      | 1 |
| <i>Ambystoma tigrinum</i>        | - |
| <i>Andrias davidianus</i>        | - |
| <i>Andrias japonicus</i>         | - |
| <i>Hynobius dunni</i>            | - |
| <i>Notophthalmus viridescens</i> | 1 |
| <i>Triturus vulgaris</i>         | - |

---

Phylogenetic tree showing relationships among various species, primarily focusing on the genus *Saprolegnia*. The tree is rooted at the bottom left and branches upwards. Species names are listed next to their corresponding nodes, often with accession numbers (e.g., EU124793, EU124794). The tree is divided into several major clades, with some clades highlighted by red boxes. A scale bar at the bottom indicates genetic distance in substitutions per site, ranging from 0 to 0.1. A scale bar at the bottom right indicates genetic distance in substitutions per site, ranging from 0 to 0.1. A scale bar at the bottom right indicates genetic distance in substitutions per site, ranging from 0 to 0.1.

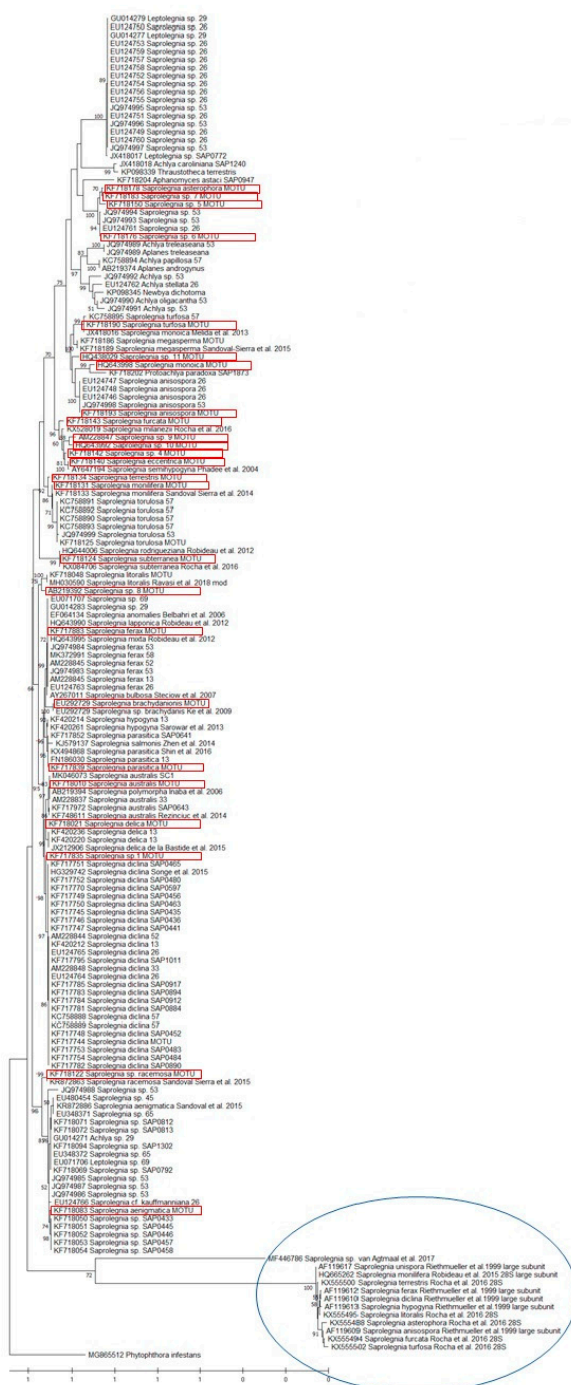

Supplement: s1 [file s1]
